# Supplementary material for: TMT-Based Quantitative Proteomics Reveal the Metabolic Changes Underlying Growth Superiority in a Novel Gymnocypris Hybrid, Gymnocypris przewalskii ♀ × G. eckloni ♂
Source: MDPI journal article supplement (doi:10.3390/fishes9050158), 2024-04-28
Supplement: s1 [file s1]

**Table S1.** Sequence information of primers used for qRT-PCR analysis.

| Protein | Forward Primer(5'-3')       | Reverse Primer(5'-3')       |
|---------|-----------------------------|-----------------------------|
| ALDO    | AGGAGGAGTTTATCAAGCGAGCCATA  | GGACTGACAGCATGACTAGAGGAGAG  |
| PK      | CGGAGAGACAGCAAAGGGTGAATAC   | GCACTGGCACAGCACTTGAAGG      |
| PGLS    | AAGAATGTGCTGATGACTATGCTGGTA | CACTGTCCTCTGGCTTTCCTGTAAT   |
| PGK     | CTAAGGCTGAGAAGAATGGCGTGAA   | CAATCTGCTTGGCTCTGGCTACA     |
| COX6A   | GAACGCCTCTGTCTCCCTCTCT      | TTAAGCAGTCAAGGTGATACAATGGTC |
| SQOR    | CACCTACCCAAACACTCCCATCAAAT  | CGCTGCTTCACTATCTCCCACAAG    |
| COX4    | TTTCAGCCAAATGGGACTATGAGAAGG | GCTTGTGATTCATTCGGTGTGTTAGAC |
| CA2     | ACATCAAATCAAAGGGCAGACAGACT  | TGTGAACAACAGGCTACGGAACCTAG  |
| ALG5    | TCTTAATCAGACTGCGTTACCTCACT  | AATATGCTAATGCTGTTACCGACTG   |
| ALDH7A1 | TCTGCGACTATGCTGTAGGACTGT    | AGATGAGAGCGATGGCGTTGTTC     |
| ACHY    | CGCCTGTAACATCTACTCCACTCAA   | CCAGTCACGCTCTCCTCTACGA      |
| β-actin | GTATTACCATTGACATTGC         | CTGAGAAGTACCAGTGAT          |

Proteins are abbreviated as follow: ALDO, fructose-bisphosphate aldolase, class I; PK, pyruvate kinase; PGLS, 6-phosphogluconolactonase; PGK, phosphoglycerate kinase; COX6A, cytochrome c oxidase subunit 6a; SQOR, eukaryotic sulfide quinone oxidoreductase; COX4, cytochrome c oxidase subunit 4; CA2, carbonic anhydrase 2; ALG5, dolichyl-phosphate beta-glucosyltransferase; ALDH7A1, aldehyde dehydrogenase family 7 member A1; AHCY, adenosylhomocysteinase.
